# Supplementary material
Source: PubMed Central journal article supplement (PMC3608209)
Supplement: NIHMS447417-supplement-supplement_1.pdf [file NIHMS447417-supplement-supplement_1.pdf]

## Supplemental Data

### An Inhibitor of Human Asparagine Synthetase

### Suppresses Proliferation of an

### L-Asparaginase-Resistant Leukemia Cell Line

Jemy A. Gutierrez, Yuan-Xiang Pan, Lukasz Koroniak, Jun Hiratake, Michael S. Kilberg, and Nigel G. J. Richards

**Table S1.** Specific Activity of hASNS Samples Incubated in the Absence of Substrates with Various Concentrations of the Adenylated Sulfoximine **1**

|                                | Specific Activity (U/mg) <sup>a</sup> | % Activity <sup>a</sup> |
|--------------------------------|---------------------------------------|-------------------------|
| WT hASNS                       | 0.46 (0.38)                           | 100 (83)                |
| WT hASNS + 5 $\mu$ M <b>1</b>  | 0.38 (0.31)                           | 83 (67)                 |
| WT hASNS + 10 $\mu$ M <b>1</b> | 0.26 (0.24)                           | 56 (52)                 |

<sup>a</sup> Values shown in parentheses are for enzyme/inhibitor samples that were not filtered through the G-50 column prior to the addition of substrates.

Procedures for these experiments are detailed in the main text of the manuscript. The higher activity values for enzyme samples that were passed through the G-50 column may be a consequence of the elimination of components present in the enzyme stock solution. Control experiments were also undertaken to ensure that the inhibitor **1** does not co-elute with the enzyme on passage through the G-50 column.

**Figure S1.** Effect of the Adenylated Sulfoximine **1** on Asn:PP<sub>i</sub> Stoichiometry

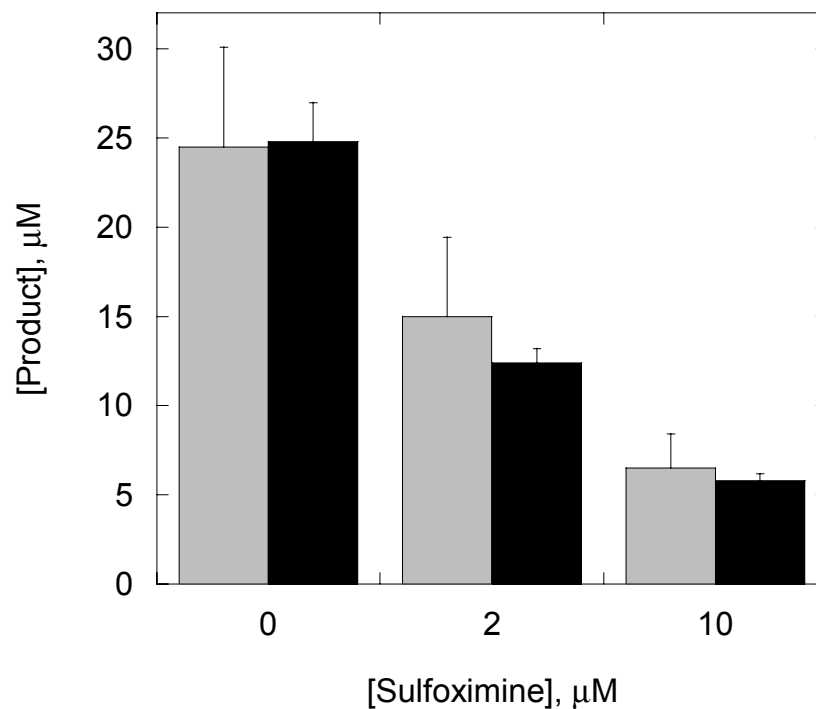

ASNS activity was routinely measured by following the production of inorganic pyrophosphate (PP<sub>i</sub>) because this is a simple continuous assay. In order to ensure that the inhibitor **1** did not affect the 1:1 ratio of Asn:PP<sub>i</sub>, we performed control experiments in which asparagine production in the presence of **1** was measured independently using an end-point HPLC assay (grey bars) (see Experimental Procedures) and compared with PP<sub>i</sub> detected using the continuous assay (black bars). The results, shown above, confirm that **1** does not affect the product stoichiometry. Errors represent the standard error of triplicate measurements.

**Figure S2.** Effect of the Adenylated Sulfoximine **1** on Asn:Glu Stoichiometry

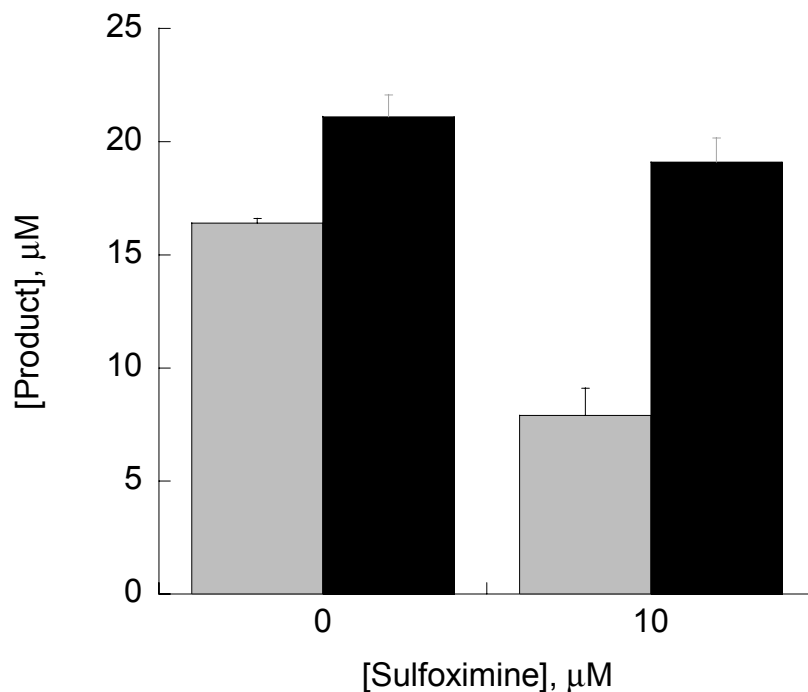

In order to evaluate the effect of the inhibitor **1** on the ratio of Asn:Glu, we performed control experiments in which asparagine (grey bars) and glutamate (black bars) production in the presence of **1** were measured independently using an end-point HPLC assay (see Experimental Procedures). Errors represent the standard error of triplicate measurements. In these experiments, hASNS (2.5 μg) was added to solutions of 5mM ATP, 10 mM L-aspartic acid, 10 mM MgCl<sub>2</sub> and 25 mM L-glutamine in 100 mM EPPS buffer, pH 8, in the absence or presence of the adenylated sulfoximine **1** (10 μM) at 37 °C. The reaction was quenched after 20 min, and the amino acids derivatized using DNFB. The amount of DNP-glutamate and DNP-asparagine were then measured by HPLC.

**Table S2.** Structure and Electronic Properties of the PM3-Optimized Phosphorylated Sulfoximine **2**

Numbers in the table refer to the atoms shown in the following structure (C5 is the equivalent of the ammonia nitrogen N5 in model transition state **3**).

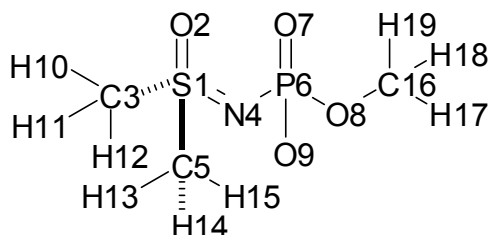

| Atom | X      | Y      | Z      | Partial Charge (e) | Bond       | Length (Å)  |
|------|--------|--------|--------|--------------------|------------|-------------|
| S1   | -2.251 | 0.495  | 0.361  | 2.001              | S1-O2      | 1.54        |
| O2   | -1.683 | 1.705  | 1.129  | -0.977             | S1-C3      | 1.77        |
| C3   | -1.222 | 0.182  | -1.042 | -0.473             | S1-C5      | 1.77        |
| N4   | -2.503 | -0.932 | 1.14   | -1.258             | S1-N4      | 1.65        |
| C5   | -3.81  | 0.963  | -0.331 | -0.476             | C5-H13     | 1.10        |
| P6   | -2.108 | -1.522 | 2.739  | 2.135              | C5-H14     | 1.10        |
| O7   | -0.925 | -2.518 | 2.678  | -1.111             | C5-H15     | 1.10        |
| O8   | -3.552 | -2.515 | 2.883  | -0.696             |            |             |
| O9   | -2.17  | -0.486 | 3.877  | -1.104             | Bond Angle | Angle (deg) |
| H10  | -0.171 | 0.024  | -0.757 | 0.137              |            |             |
| H11  | -1.532 | -0.712 | -1.602 | 0.131              | C5-S1-O2   | 108.2       |
| H12  | -1.23  | 1.02   | -1.755 | 0.132              | C5-S1-N4   | 106.2       |
| H13  | -3.721 | 1.825  | -1.008 | 0.132              | C5-S1-C3   | 104.4       |
| H14  | -4.273 | 0.153  | -0.914 | 0.132              | O2-S1-N4   | 120.1       |
| H15  | -4.539 | 1.247  | 0.443  | 0.137              | O2-S1-C3   | 108.7       |
| C16  | -3.694 | -3.221 | 4.071  | 0.1                | O4-S1-C3   | 108.1       |
| H17  | -2.834 | -3.105 | 4.741  | 0.028              |            |             |
| H18  | -3.817 | -4.282 | 3.824  | 0.015              |            |             |
| H19  | -4.598 | -2.867 | 4.58   | 0.015              |            |             |

**Table S3.** Structure and Electronic Properties of the PM3-Optimized Transition State **3** for Ammonia Attack on an Acylphosphate

Numbers in the table refer to the atoms shown in the following structure.

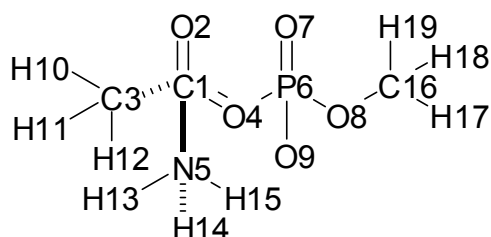

| Atom | X      | Y      | Z      | Partial Charge (e) | Bond       | Length (Å)  |
|------|--------|--------|--------|--------------------|------------|-------------|
| C1   | -0.825 | 0.955  | 1.099  | 0.263              | C1-O2      | 1.36        |
| O2   | 0.536  | 0.955  | 1.099  | -0.648             | C1-C3      | 1.53        |
| C3   | -1.52  | 2.316  | 1.099  | -0.126             | C1-N5      | 1.64        |
| O4   | -1.02  | 0.07   | 0.069  | -0.603             | C1-O4      | 1.37        |
| N5   | -1.35  | 0.154  | 2.426  | 0.513              | N5-H13     | 1.00        |
| P6   | 0.68   | -0.239 | -0.397 | 2.005              | N5-H14     | 1.00        |
| O7   | 1.429  | 0.729  | -1.349 | -0.94              | N5-H15     | 1.00        |
| O8   | -0.364 | -1.103 | -1.556 | -0.668             |            |             |
| O9   | 1.419  | -1.365 | 0.365  | -0.976             | Bond Angle | Angle (deg) |
| H10  | -1.137 | 2.954  | 0.288  | 0.079              |            |             |
| H11  | -2.601 | 2.226  | 0.928  | 0.021              | N5-C1-O2   | 108.7       |
| H12  | -1.342 | 2.87   | 2.03   | 0.016              | N5-C1-O4   | 104.3       |
| H13  | -1.32  | 0.744  | 3.232  | -0.021             | N5-C1-C3   | 106.9       |
| H14  | -2.298 | -0.138 | 2.303  | -0.006             | O2-C1-O4   | 98.2        |
| H15  | -0.801 | -0.659 | 2.616  | 0.038              | O2-C1-C3   | 117.1       |
| H16  | 0.212  | -1.99  | -2.45  | 0.178              | O4-C1-C3   | 120.7       |
| H17  | 1.308  | -1.987 | -2.424 | -0.015             |            |             |
| H18  | -0.119 | -1.735 | -3.465 | -0.052             |            |             |
| H19  | -0.142 | -3.003 | -2.22  | -0.058             |            |             |
